# Supplementary material for: First principles study of g-Mg3N2 as an anode material for Na-, K-, Mg-, Ca- and Al-ion storage
Source: Royal Society of Chemistry journal article supplement (doi:10.1039/c9ra06189d), 2019-01-01
Supplement: c9ra06189d1.pdf [file c9ra06189d1.pdf]

## Supporting Information for

### First principles study of $g\text{-Mg}_3\text{N}_2$ as anode material for Na-, K-, Mg-, Ca- and Al-ion storage

Lixin Xiong<sup>1</sup>, Hewen Wang<sup>2\*</sup>, Wan Xiong<sup>1</sup>, Sicheng Yu<sup>1</sup>, Chuying Ouyang<sup>1\*</sup>

<sup>1</sup>Department of Physics, Laboratory of Computational Materials Physics, Jiangxi Normal University, Nanchang, 330022, China

<sup>2</sup> College of Chemistry and Chemical Engineering, Hubei Key Laboratory for Processing and Application of Catalytic Materials, Huanggang Normal University, Huanggang, 438000, P. R. China

\*Corresponding author's E-mail: [wanghewen2014@126.com](mailto:wanghewen2014@126.com)

\*Corresponding author's E-mail: [cyouyang@jxnu.edu.cn](mailto:cyouyang@jxnu.edu.cn)

#### SI-1. Adsorption energies of metal-ions

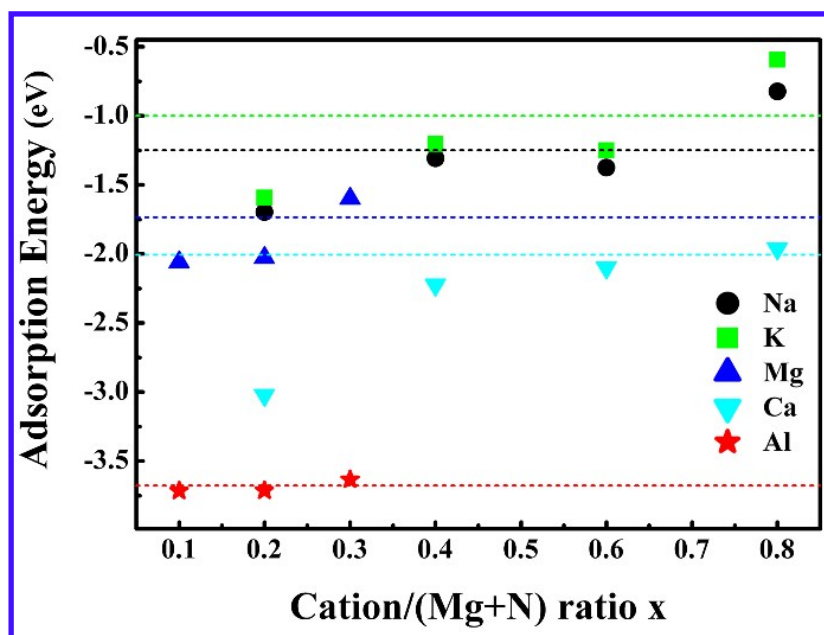

Fig. S1. Calculated sequential metal-ion adsorption energies on  $g\text{-Mg}_3\text{N}_2$  as a function of the adsorption concentration  $x$ . The dotted lines represent the cohesive energies of the corresponding bulk phase metals.

## SI-2. Phonon dispersion data

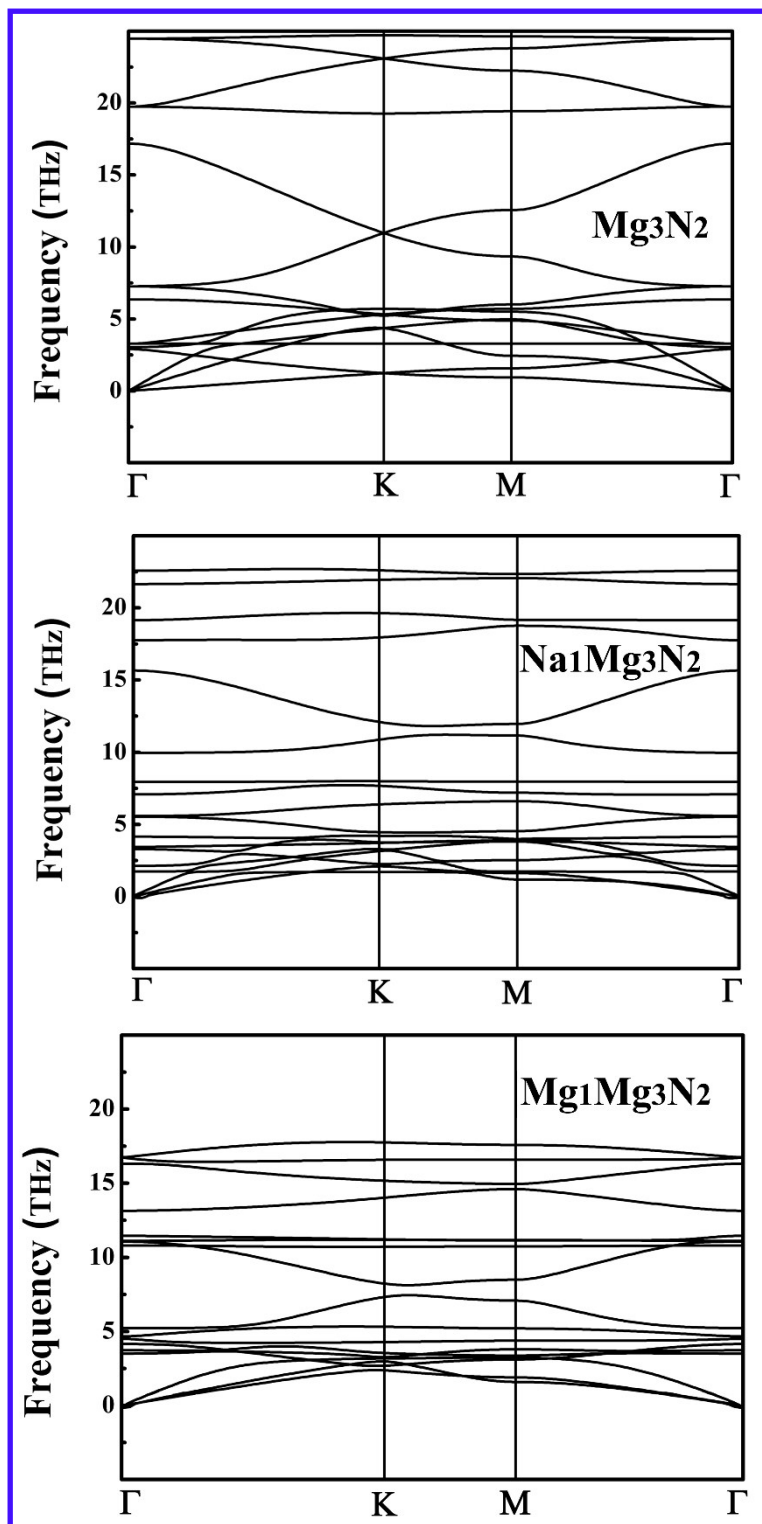

Fig. S2. The phonon dispersion spectrum of  $g\text{-Mg}_3\text{N}_2$ ,  $\text{Na}_1\text{Mg}_3\text{N}_2$  and  $\text{Mg}_1\text{Mg}_3\text{N}_2$ .

### SI-3. Ab-initio molecular dynamics simulation

In order to investigate the thermal stability of  $g\text{-Mg}_3\text{N}_2$  monolayer after metal-ions adsorption, *ab initio* molecular dynamics (AIMD) simulations are performed to check the structural change of the  $g\text{-Mg}_3\text{N}_2$  monolayer at some highest content of adsorbed adatoms ( $\text{Na}_3\text{Mg}_3\text{N}_2$ ,  $\text{Mg}_1\text{Mg}_3\text{N}_2$ ). The results are given in Fig. S1. As is seen, the structure of the  $g\text{-Mg}_3\text{N}_2$  monolayer is changed slightly at 300 K up to 6 ps. Upon relaxation, the structure after the AIMD simulation will recover to its original state, indicating that the bonding/coordination of the structure is not changed at 300 K. Furthermore, no clustering of the adsorbed metal-ions is observed during the AIMD simulation, suggesting that the  $g\text{-Mg}_3\text{N}_2$  monolayer will maintain good cycling stability.

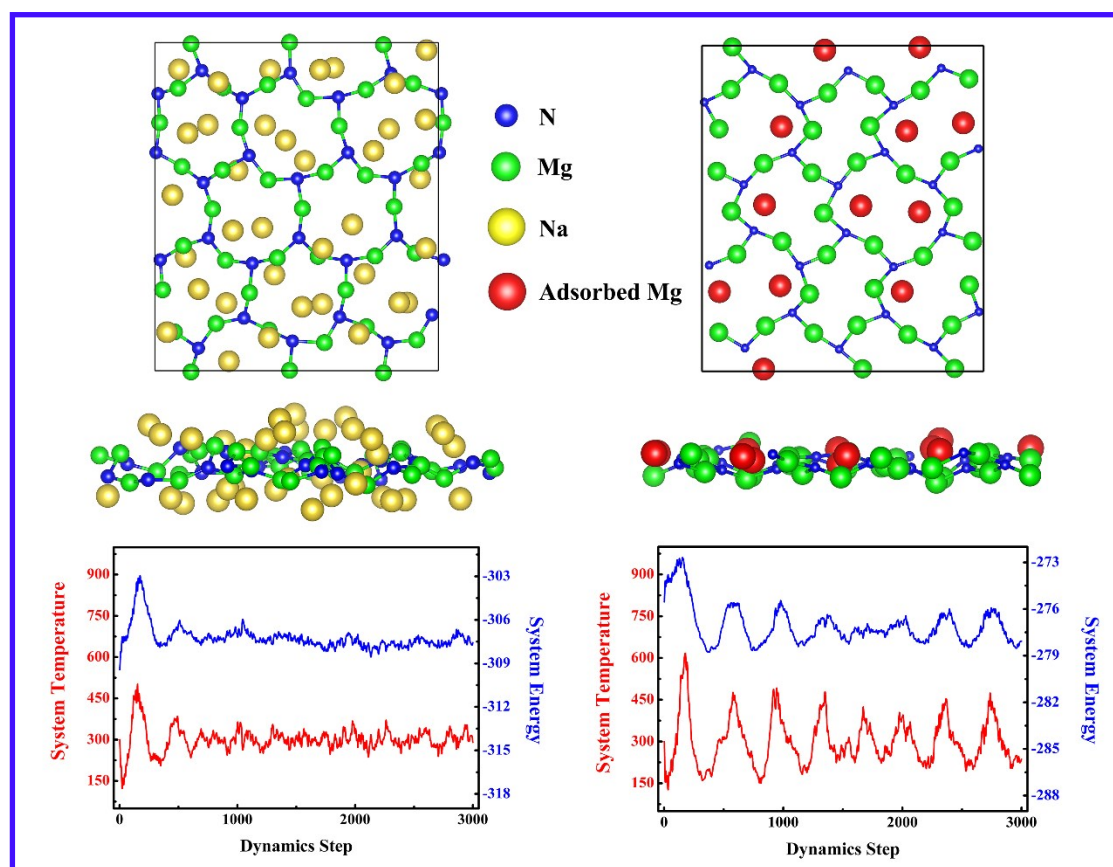

Fig. S3. Top and side views of the structures of  $g\text{-Mg}_3\text{N}_2$  with highest Na- and Mg-ion adsorption concentrations after 6ps of the AIMD simulation at 300 K. The fluctuations of system temperature and energy as functions of simulation time are also presented.
